# Supplementary material for: Reduced subgenomic RNA expression is a molecular indicator of asymptomatic SARS-CoV-2 infection
Source: PubMed Central journal article supplement (PMC9053197; doi:10.1038/s43856-021-00034-y), 2021-09-22
Supplement: 43856_2021_34_MOESM11_ESM.pdf [file 43856_2021_34_MOESM11_ESM.pdf]

## **Description of Additional Supplementary Files**

**File Name:** Supplementary Data 1

**Description:** Sample summary

**File Name:** Supplementary Data 2

**Description:** Amplicon-sequencing primer sequences

**File Name:** Supplementary Data 3

**Description:** Amplicon-Seq data summary

**File Name:** Supplementary Data 4

**Description:** Poly-A+ RNA-Seq data summary

**File Name:** Supplementary Data 5

**Description:** Deletions enriched in the asymptomatic and symptomatic samples

**File Name:** Supplementary Data 6

**Description:** Iso-Seq data summary

**File Name:** Supplementary Data 7

**Description:** Identified peptides unique to Iso-Seq full-length transcript units (TUs) translation

**File Name:** Supplementary Data 8

**Description:** Source data
